# Supplementary material for: A DFT Investigation of The Host-Guest Interactions Between Boron-Based Aromatic Systems and β-Cyclodextrin
Source: Research Square preprint supplement (doi:10.21203/rs.3.rs-488597/v1), 2021-05-10
Supplement: Supplementary file 1 [file c8ff623528d4f3d39276f35d.docx]

**A DFT investigation of the host-guest interactions between boron-based aromatic systems and β-cyclodextrin**

Seyfeddine Rahalia,b,*, Youghourta Belhocinec, Hamza Allald, Abdelaziz Bouhadibac, Ibtissem Meriem Assabac, Mahamadou Seydoue

a Department of Chemistry, College of Science and Arts, Qassim University, Ar Rass, Saudi Arabia.

b IPEIEM, Research Unit on Fundamental Sciences and Didactics, Université de Tunis El Manar, Tunis 2092, Tunisia

c Department of Petrochemical and Process Engineering, Faculty of Technology, 20 August 1955 University of Skikda, P.O. Box 26, El Hadaik Road, 21000, Skikda, Algeria

d Department of Technology, Faculty of Technology, 20 August 1955 University of Skikda, P.O. Box 26, El Hadaik Road, 21000, Skikda, Algeria

**e** Université de Paris, ITODYS, CNRS, UMR 7086, 15 rue J-A de Baïf, F-75013 Paris, France.

**Appendix A Supplementary Data:**

1. **Determination of the exchange constant**

In the calculation of the Kexc, we considered for each complex two or three most stable configurations. An example for the Bxb@β-CD complex is shown in Fig.S1.


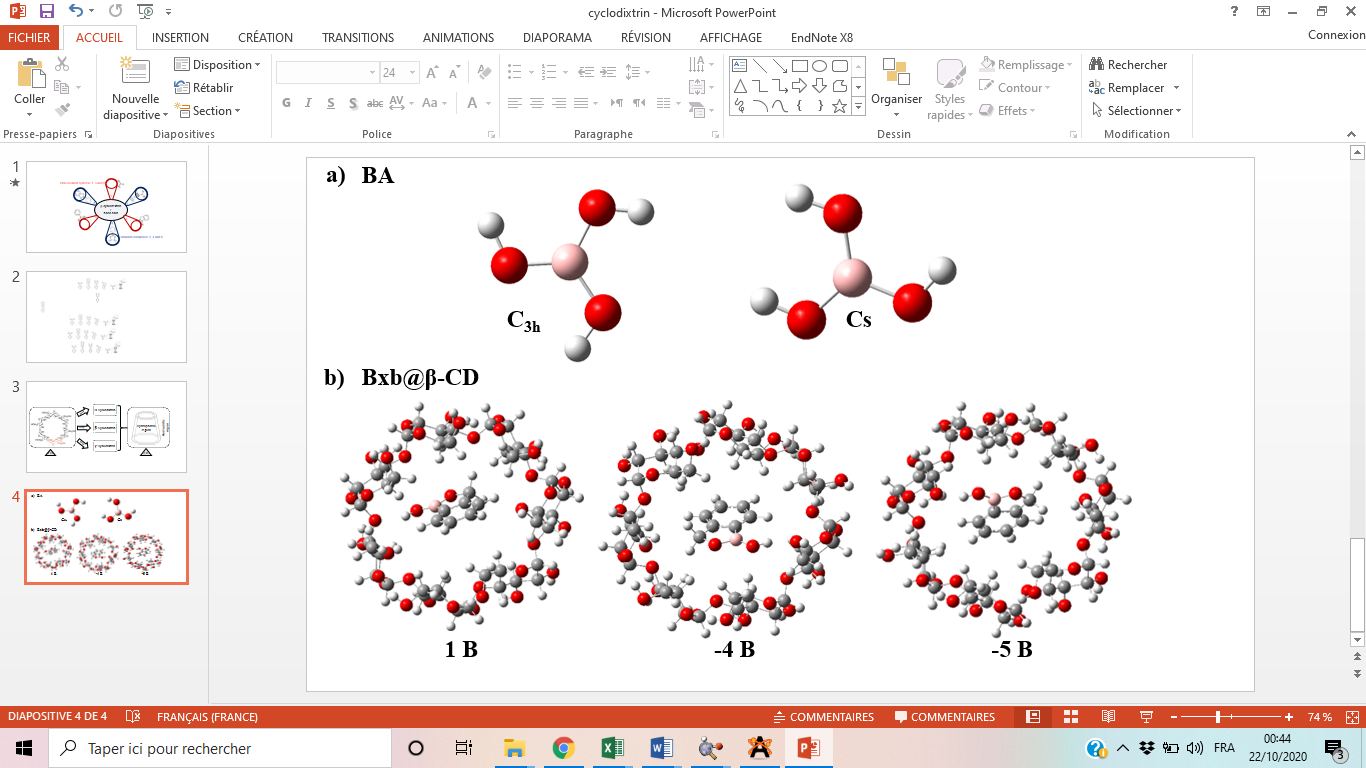


Fig. S1. Calculated thermodynamic parameters for the three most stable conformers of Bxb@β-CD at the BLYP-D3(BJ)/def2-SVP level of theory.

Table S1. Thermodynamic parameters used for the calculation of exchange constants

| **species** | | **Egas (ua)** | **ZPE (ua)** | **Esol (ua)** | **G°gas, 298 (ua)** | **G*sol, 298  (ua)** |
| --- | --- | --- | --- | --- | --- | --- |
| PBA | | -407.79842 | 0.12042 | -407.81372 | -407.67801 | -407.69331 |
| PhBcat | | -637.38646 | 0.17846 | -637.39343 | -637.20800 | -637.21497 |
| PhBpin | | -642.12905 | 0.26222 | -642.13770 | -641.86683 | -641.87548 |
| Bxb | | -445.85739 | 0.12749 | -445.87033 | -445.72990 | -445.74284 |
| FcBA | | -1826.09080 | 0.18601 | -1826,10476 | -1825.90478 | -1825.91875 |
| PBA@β-CD | 3B | -4678.21410 | 1.28581 | -4678.28882 | -4676.92929 | -4677.01502 |
| 0B | -4678.21409 | 1.28580 | -4678.30022 |
| PhBcat@β-CD | -3B | -4907.80196 | 1.34311707 | -4907.88137 | -4906.46009 | -4906.53906 |
| 0B | -4907.80195 | 1.34312444 | -4907.88131 |
| 1A | -4907.80281 | 1.34342239 | -4907.88085 |
| PhBpin@β-CD | -4B | -4912.55174 | 1.42865902 | -4912.62064 | -4911.12315 | -4911.19821 |
| 2A | -4912.54855 | 1.42780402 | -4912.62601 |
| Bxb@β-CD | -5A | -4716.27061 | 1.2919649 | -4716.35255 | -4714.97885 | -4715.06565 |
| -4A | -4716.26842 | 1.29181053 | -4716.35746 |
| 1B | -4716.26954 | 1.29285748 | -4716.35289 |
| BA@β-CD | -4B | -4522.61950 | 1.21184319 | -4522.70606 | -4521.40786 | -4521.49668 |
| -1B | -4522.61703 | 1.21139082 | -4522.70729 |
| FcBA@β-CD | 0A | -6096.51154 | 1.35112691 | -6096.59514 | -6095.16105 | -6095.24561 |
| -2A | -6096.51153 | 1.35114447 | -6096.59656 |

1. **RDG-isosurfaces of the six studied complexes**


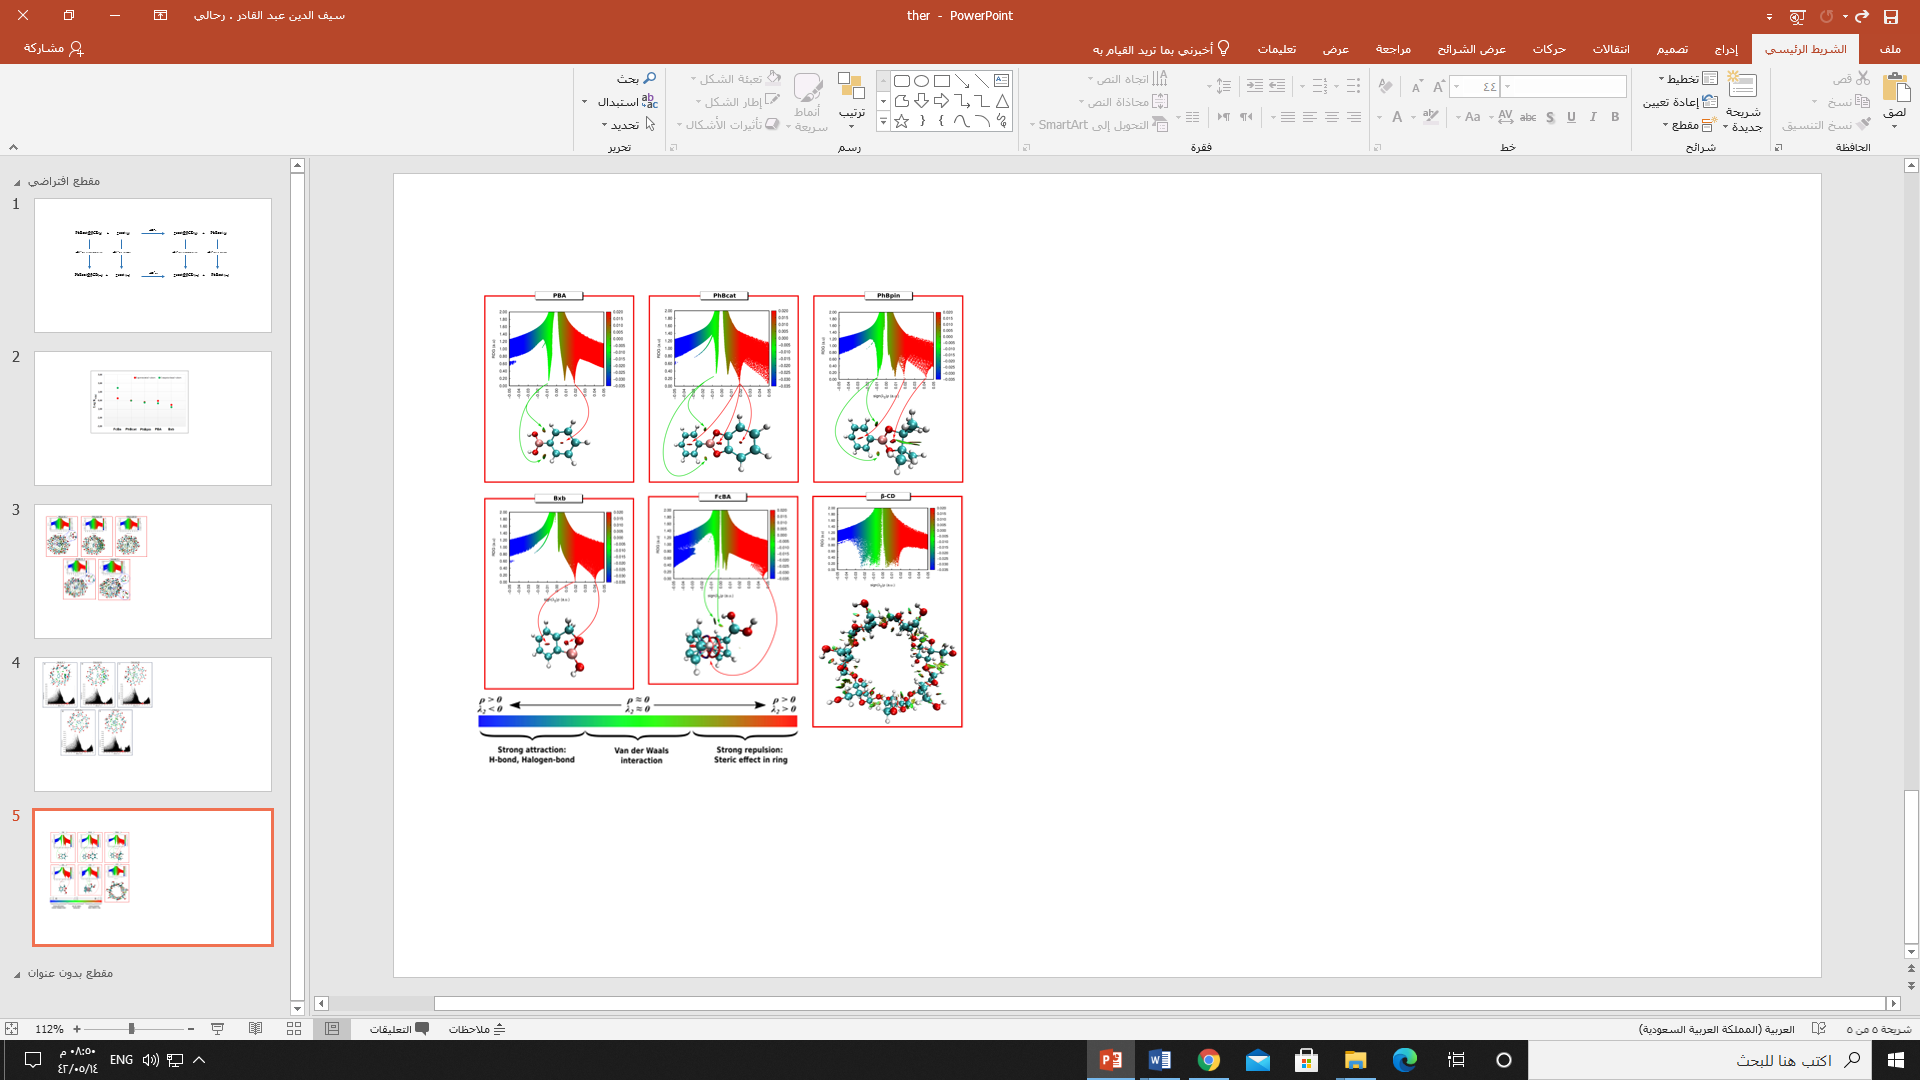


**Fig. S2.** RDG-isosurfaces of isolated β-CD and studied aromatic boron compounds computed at BLYP-D3(BJ) level. Atom's color code: pink for B, purple for Fe, blue for C, red for O and white for H.

1. Supplementary structures

**Table S2.** Cartesian coordinates (in angstrom) of aromatic boron compounds and their complexes optimized at BLYP-D3(BJ)/def2-SVP level of theory in vacuum and aqueous solution

| **Species** | **Geometries in gas phase** | **Geometries in aqueous solution** |
| --- | --- | --- |
| **PBA** | B -0.20932 -0.17441 3.38451  C -0.02174 0.01350 4.94054  C -0.70370 1.04390 5.64429  C -0.53852 1.21367 7.03341  C 0.31667 0.35147 7.75280  C 1.00299 -0.67958 7.07551  C 0.83388 -0.84365 5.68640  O -1.07036 0.69044 2.72574  O 0.49623 -1.19523 2.76519  H -1.37342 1.72334 5.08911  H -1.07612 2.02177 7.56043  H 0.44936 0.48475 8.84143  H 1.67225 -1.35752 7.63455  H 1.37458 -1.65276 5.16568  H -1.16772 0.53914 1.76389  H 0.35373 -1.28382 1.80111 | B -0.20931 -0.17453 3.37641  C -0.02050 0.01463 4.93930  C -0.70320 1.04380 5.64647  C -0.53970 1.21361 7.03720  C 0.31668 0.35151 7.75770  C 1.00490 -0.67862 7.07874  C 0.83568 -0.84121 5.68791  O -1.06332 0.69237 2.71795  O 0.48822 -1.19843 2.76025  H -1.37484 1.72573 5.09585  H -1.07909 2.02052 7.56414  H 0.44800 0.48398 8.84647  H 1.67491 -1.35672 7.63662  H 1.38004 -1.65134 5.17179  H -1.15451 0.52592 1.75444  H 0.33482 -1.27622 1.79337 |
| **PhBcat** | C 0.75596 -0.42178 7.07404  C -0.08456 0.71471 7.14193  C -0.24111 -0.06482 3.49021  C 0.38754 -1.07390 2.70785  C -1.11139 0.84997 2.83292  C -1.34712 0.75753 1.44804  C -0.71486 -0.25220 0.69019  C 0.15507 -1.16715 1.32222  B 0.00807 0.02893 5.01854  O -0.55498 1.00539 5.86639  O 0.82282 -0.85590 5.75502  C 1.37489 -0.95374 8.21149  C 1.11928 -0.29483 9.44058  C -0.34207 1.37333 8.35034  C 0.28029 0.84257 9.50819  H 1.06590 -1.79484 3.19686  H -1.60950 1.64147 3.41930  H -2.02723 1.47362 0.95402  H -0.90285 -0.32750 -0.39557  H 0.65097 -1.95681 0.73095  H 2.02393 -1.84214 8.14796  H 1.58497 -0.67967 10.36341  H -0.99580 2.25953 8.39243  H 0.10456 1.32851 10.48278 | C 0.75400 -0.42301 7.07807  C -0.08156 0.71608 7.14489  C -0.24130 -0.06524 3.48930  C 0.39144 -1.07202 2.70507  C -1.11598 0.84740 2.83221  C -1.35200 0.75512 1.44637  C -0.71543 -0.25224 0.68691  C 0.15895 -1.16502 1.31841  B 0.00803 0.02859 5.01792  O -0.55135 1.00791 5.86613  O 0.81936 -0.85891 5.75639  C 1.37163 -0.95843 8.21501  C 1.11778 -0.29658 9.44424  C -0.33809 1.37837 8.35190  C 0.28269 0.84507 9.51086  H 1.07397 -1.79294 3.18861  H -1.61947 1.63819 3.41521  H -2.03511 1.46898 0.95357  H -0.90309 -0.32703 -0.39880  H 0.65821 -1.95208 0.72676  H 2.01746 -1.84953 8.15417  H 1.58208 -0.68300 10.36710  H -0.98794 2.26752 8.39510  H 0.10852 1.33308 10.48469 |
| **PhBpin** | C 0.21840 0.15725 -1.49224  C 1.50734 0.47346 -2.00257  C 1.72080 0.64417 -3.38454  C 0.64591 0.49654 -4.28750  C -0.64130 0.17877 -3.80244  C -0.85028 0.01364 -2.41912  B -0.01846 -0.02208 0.04494  O -1.25108 -0.34159 0.59334  C -1.14128 -0.21329 2.05774  C -1.96739 -1.33884 2.71394  C -1.73733 1.16727 2.43567  O 0.98304 0.12638 0.99219  C 0.44472 -0.31216 2.29255  C 0.99854 0.61674 3.39265  C 0.94567 -1.76112 2.52343  H 2.35184 0.58936 -1.30098  H 2.72748 0.89537 -3.76266  H 0.81191 0.63173 -5.37122  H -1.48382 0.06145 -4.50671  H -1.85931 -0.23224 -2.04473  H -1.67594 -2.34097 2.34023  H -1.84595 -1.32569 3.82036  H -3.04727 -1.19628 2.48849  H -2.78058 1.22970 2.05782  H -1.76000 1.31669 3.53686  H -1.16494 2.00410 1.98216  H 0.80174 1.68614 3.17395  H 0.54946 0.37051 4.38036  H 2.09962 0.48710 3.47916  H 2.05604 -1.77638 2.46730  H 0.64642 -2.14391 3.52352  H 0.55920 -2.46202 1.75249 | C 0.21900 0.15777 -1.49601  C 1.50913 0.47111 -2.00878  C 1.72328 0.64165 -3.39183  C 0.64695 0.49687 -4.29540  C -0.64177 0.18219 -3.80917  C -0.85034 0.01729 -2.42448  B -0.01839 -0.02193 0.04410  O -1.24970 -0.34565 0.58950  C -1.14109 -0.21393 2.06491  C -1.96422 -1.33982 2.72082  C -1.73776 1.16658 2.43591  O 0.98263 0.13167 0.98903  C 0.44250 -0.31286 2.29927  C 0.99369 0.61641 3.39833  C 0.94595 -1.76034 2.52340  H 2.35843 0.58609 -1.31243  H 2.73070 0.89022 -3.76920  H 0.81256 0.63149 -5.37906  H -1.48514 0.06724 -4.51261  H -1.86219 -0.22587 -2.05519  H -1.67110 -2.34254 2.34929  H -1.83511 -1.32268 3.82572  H -3.04570 -1.19566 2.50309  H -2.78341 1.22571 2.06322  H -1.75762 1.31469 3.53673  H -1.16608 2.00393 1.98197  H 0.79684 1.68611 3.17990  H 0.53620 0.36884 4.38110  H 2.09356 0.48164 3.49394  H 2.05698 -1.77359 2.47361  H 0.64458 -2.14164 3.52276  H 0.55985 -2.46120 1.75195 |
| **Bxb** | C -0.77268 1.86885 6.28432  C -0.18419 1.33792 7.45287  C -0.64440 1.14754 5.08195  C 0.05853 -0.08703 5.02653  C 0.64097 -0.60430 6.20573  C 0.51815 0.10934 7.41621  H -1.31750 2.82889 6.32223  H -0.27217 1.88641 8.40708  H 1.19053 -1.56391 6.19277  H 0.96950 -0.28765 8.34192  C -1.18157 1.49213 3.69776  O -0.76760 0.42349 2.81603  B -0.04270 -0.53387 3.51809  O 0.43625 -1.63308 2.84736  H -0.77988 2.46263 3.31665  H -2.29658 1.57116 3.68521  H 0.92433 -2.24400 3.43440 | C -0.77462 1.87136 6.28367  C -0.18542 1.33921 7.45252  C -0.64494 1.14843 5.08116  C 0.05929 -0.08662 5.02824  C 0.64325 -0.60655 6.20709  C 0.51865 0.10940 7.41710  H -1.31996 2.83070 6.31888  H -0.27403 1.88762 8.40676  H 1.19165 -1.56577 6.18871  H 0.96962 -0.28555 8.34389  C -1.18365 1.49768 3.70106  O -0.76483 0.42024 2.81495  B -0.03867 -0.53640 3.52618  O 0.43505 -1.63201 2.84642  H -0.78021 2.46528 3.31880  H -2.29749 1.57242 3.68715  H 0.92530 -2.25492 3.42451 |
| **FcBA** | Fe 0.00010 0.00246 5.00003  C 1.06795 -0.33767 3.24157  C -0.27357 -0.89586 3.14026  H -0.50242 -1.95940 2.97663  C -1.23702 0.16182 3.30839  H -2.33220 0.05146 3.29332  C -0.51395 1.39489 3.51688  H -0.95951 2.38737 3.68301  C 0.89551 1.09172 3.47710  H 1.69975 1.83458 3.60594  C 1.24905 -0.25205 6.65002  H 2.34906 -0.22049 6.62082  C 0.43384 -1.43124 6.45030  H 0.80538 -2.44611 6.24337  C -0.95208 -1.03567 6.54718  H -1.82282 -1.69912 6.43531  C -0.99500 0.38609 6.80313  H -1.90374 0.99445 6.92439  C 0.36539 0.87047 6.86805  H 0.67154 1.91199 7.04811  B 2.39776 -1.16202 3.32212  O 3.62445 -0.61225 3.67927  H 3.56770 0.33841 3.90171  O 2.35529 -2.51522 3.04683  H 3.23514 -2.93350 3.16230 | Fe -0.00058 -0.00028 4.99861  C 1.06641 -0.34142 3.24096  C -0.27796 -0.89992 3.14197  H -0.51630 -1.96256 2.98214  C -1.24066 0.16064 3.30885  H -2.33636 0.05160 3.29512  C -0.51405 1.39354 3.51438  H -0.95847 2.38682 3.68133  C 0.89600 1.08968 3.47468  H 1.70530 1.82595 3.60724  C 1.25181 -0.24859 6.64720  H 2.35162 -0.21177 6.61226  C 0.43642 -1.42987 6.45211  H 0.80858 -2.44585 6.24934  C -0.95117 -1.03498 6.54921  H -1.82220 -1.69916 6.43988  C -0.99444 0.38852 6.80215  H -1.90353 0.99703 6.92231  C 0.36695 0.87407 6.86420  H 0.67383 1.91665 7.03813  B 2.40031 -1.16008 3.32279  O 3.61861 -0.60954 3.69954  H 3.56148 0.33656 3.95000  O 2.36573 -2.50849 3.01289  H 3.23827 -2.94347 3.13871 |
| **PBA@β-CD** | C 5.72897 -2.99410 0.23050  C 6.43020 -2.16484 1.33764  C 5.91622 -0.71183 1.35048  C 5.91633 -0.07324 -0.06597  C 5.32491 -1.03255 -1.14495  C 5.54207 -0.55539 -2.58556  C 1.21113 -5.94698 0.50286  C 2.14643 -5.92892 1.73926  C 2.98892 -4.63765 1.78897  C 3.68941 -4.40160 0.42676  C 2.66113 -4.42723 -0.73662  C 3.25461 -4.22858 -2.16050  C -3.96499 -4.59484 -0.03120  C -3.50196 -5.42877 1.19721  C -2.03108 -5.12693 1.55037  C -1.15656 -5.30763 0.28760  C -1.67948 -4.42366 -0.87553  C -0.89127 -4.57356 -2.20761  C -6.43662 0.23176 0.24286  C -6.82573 -0.84556 1.29213  C -5.69878 -1.88845 1.46232  C -5.24426 -2.46297 0.09358  C -4.95818 -1.31026 -0.91721  C -4.67457 -1.80846 -2.34007  C -3.84674 4.86348 1.15088  C -4.55495 4.26037 2.38937  C -4.74224 2.73830 2.23075  C -5.43602 2.41851 0.88537  C -4.74598 3.13207 -0.31542  C -5.50554 2.99196 -1.64374  C 1.39825 5.71147 0.32820  C 0.72787 6.18702 1.64398  C -0.50857 5.32810 1.97278  C -1.45011 5.27311 0.74506  C -0.69334 4.79992 -0.52470  C -1.55967 4.74279 -1.81435  C 5.50855 2.35345 -0.50177  C 5.59277 3.42422 0.62558  C 4.19282 3.79035 1.16020  C 3.26292 4.14442 -0.02345  C 3.22420 2.97799 -1.04622  C 2.30688 3.21881 -2.27450  O 6.22647 -2.81158 2.61009  O 6.73003 0.01876 2.27302  O 5.10076 1.11122 0.06714  O 5.94230 -2.35408 -1.03580  O 4.79307 -1.41642 -3.46014  O 1.35398 -6.10434 2.92961  O 3.91392 -4.78806 2.87104  O 4.34493 -3.11144 0.53186  O 1.97907 -5.73532 -0.69627  H 3.19094 -3.14844 -2.42435  O 4.58765 -4.72043 -2.33080  O -4.38217 -5.18794 2.31434  O -1.66854 -6.01577 2.61267  O 0.20064 -4.95954 0.65500  O -3.08239 -4.79775 -1.13191  O -0.41981 -5.89063 -2.49998  O -7.12512 -0.19780 2.54467  O -6.19702 -2.89525 2.34461  O -4.03655 -3.21499 0.33698  O -6.10393 -0.41326 -0.99658  O -3.93332 -0.78925 -3.09065  O -3.79627 4.59207 3.56878  O -5.50477 2.28985 3.35796  O -5.33558 0.98136 0.73675  O -4.60001 4.56771 -0.03714  O -6.89269 3.32502 -1.45378  O 1.70114 6.16069 2.70469  O -1.13043 5.90799 3.12542  O -2.52303 4.35427 1.06898  O 0.43780 5.71638 -0.74618  O -2.54291 5.77304 -1.95010  O 6.45853 2.94890 1.67869  O 4.36972 4.87492 2.07958  O 1.95256 4.42012 0.52726  O 4.60204 2.77039 -1.51966  O 2.31374 4.54576 -2.80614  H 6.20034 -4.00011 0.14135  H 7.52160 -2.14592 1.08750  H 4.84920 -0.73269 1.68796  H 6.96718 0.20051 -0.33503  H 4.22793 -1.11525 -0.96805  H 6.64041 -0.58188 -2.81463  H 5.19750 0.50516 -2.66015  H 0.75754 -6.95920 0.38478  H 2.85535 -6.78830 1.62036  H 2.29353 -3.77569 1.96591  H 4.44827 -5.19719 0.24275  H 1.89473 -3.63624 -0.56448  H -4.96381 -4.95379 -0.37844  H -3.56306 -6.50700 0.89953  H -1.95232 -4.05563 1.87251  H -1.19638 -6.37147 -0.04593  H -1.64595 -3.34867 -0.58200  H -0.06716 -3.82021 -2.20413  H -1.58605 -4.27282 -3.02680  H -7.29800 0.89686 0.00512  H -7.73512 -1.37445 0.90648  H -4.80868 -1.36438 1.89849  H -6.04894 -3.13185 -0.30531  H -4.06972 -0.74846 -0.54477  H -5.64511 -2.02572 -2.84395  H -4.07607 -2.74671 -2.29789  H -3.83785 5.97673 1.22043  H -5.57140 4.72746 2.44257  H -3.73047 2.25682 2.20940  H -6.50383 2.73190 0.94280  H -3.73908 2.67576 -0.45470  H -5.38311 1.93874 -2.00046  H -5.01103 3.66755 -2.38816  H 2.18594 6.43774 0.01838  H 0.37919 7.23761 1.47017  H -0.16202 4.28449 2.18399  H -1.86588 6.28849 0.54375  H -0.28502 3.77991 -0.34495  H -2.00780 3.72162 -1.86626  H -0.85995 4.82675 -2.67899  H 6.50176 2.24978 -1.00145  H 6.03102 4.34757 0.16701  H 3.75771 2.89305 1.67171  H 3.65037 5.04820 -0.55137  H 2.87150 2.04724 -0.54204  H 1.27778 2.88173 -1.99439  H 2.65559 2.52859 -3.07790  H 6.54761 -2.18043 3.29296  H 6.49014 0.97928 2.20340  H 4.89455 -1.08439 -4.37601  H 1.95206 -5.91200 3.68674  H 4.53657 -4.01736 2.86559  H 5.17145 -3.92727 -2.31269  H -3.92471 -5.56733 3.09972  H -0.71089 -5.87748 2.82553  H 0.46994 -5.97939 -2.08163  H -7.21771 -0.92499 3.20236  H -5.50159 -3.59619 2.45318  H -4.22277 -0.81629 -4.02644  H -4.16616 4.04527 4.29789  H -5.84349 1.37942 3.16456  H -7.33131 3.29221 -2.32902  H 1.19411 6.28230 3.53940  H -1.91314 5.35307 3.37425  H -3.34100 5.48631 -1.44565  H 6.34419 3.58746 2.41995  H 3.47880 5.15149 2.41400  H 1.65911 5.07328 -2.28848  H 2.57713 -4.77089 -2.86420  B -1.19993 0.03903 -1.32169  C -0.12251 0.21155 -0.18255  C -0.25950 1.20669 0.82417  C 0.67906 1.32131 1.87035  C 1.76921 0.42917 1.94201  C 1.91963 -0.57512 0.96117  C 0.98751 -0.67245 -0.09058  O -2.19726 0.99926 -1.45451  O -1.14128 -1.08210 -2.13352  H -1.12155 1.89422 0.79565  H 0.55556 2.10320 2.63991  H 2.50010 0.51010 2.76621  H 2.75400 -1.29081 1.02220  H 1.11434 -1.45811 -0.85574  H -2.89382 0.73016 -2.09866  H -1.90977 -1.13208 -2.75060 | C 5.46525 -2.91933 -0.44535  C 6.33032 -2.17583 0.61111  C 5.78713 -0.75502 0.87603  C 5.54441 0.01932 -0.44720  C 4.70490 -0.83583 -1.44008  C 4.54411 -0.21011 -2.82946  C 1.26187 -6.17261 0.39315  C 2.30239 -6.10748 1.54761  C 3.06076 -4.76626 1.50018  C 3.65556 -4.52993 0.09149  C 2.58793 -4.70111 -1.02849  C 3.15486 -4.64452 -2.45575  C -3.90435 -4.59673 0.62534  C -3.24374 -5.02844 1.96427  C -1.71032 -4.84770 1.92557  C -1.12604 -5.52775 0.66226  C -1.86125 -5.05961 -0.62650  C -1.41624 -5.78765 -1.90315  C -6.22469 0.21072 -0.11816  C -6.70508 -0.78300 0.97693  C -5.57455 -1.76224 1.36456  C -4.98350 -2.44407 0.09849  C -4.58355 -1.37544 -0.95820  C -4.10754 -1.97267 -2.29147  C -3.98442 5.05043 0.62938  C -4.91303 4.55803 1.77566  C -5.00812 3.01735 1.77603  C -5.37033 2.49109 0.36552  C -4.45191 3.09233 -0.73726  C -4.87179 2.73416 -2.17086  C 1.35344 5.80268 0.95998  C 0.57747 5.92287 2.29739  C -0.76373 5.16278 2.23945  C -1.56732 5.55536 0.97328  C -0.70703 5.47770 -0.32001  C -1.40283 6.01649 -1.57853  C 5.30226 2.49915 -0.48972  C 5.42257 3.42397 0.75860  C 4.02845 3.71300 1.35252  C 3.10271 4.25421 0.23563  C 3.04507 3.27045 -0.96025  C 2.14683 3.73946 -2.13124  O 6.37239 -2.97050 1.81698  O 6.72913 -0.08674 1.72960  O 4.83320 1.22355 -0.07201  O 5.36877 -2.12682 -1.62888  O 3.51868 -0.92615 -3.54117  O 1.61466 -6.30005 2.80391  O 4.07842 -4.78435 2.51578  O 4.18029 -3.18295 0.11030  O 1.92057 -5.99641 -0.86455  H 3.47281 -3.59670 -2.66454  O 4.25012 -5.57065 -2.60209  O -3.84963 -4.27325 3.03641  O -1.17480 -5.40832 3.13454  O 0.27427 -5.16479 0.61070  O -3.30188 -5.28350 -0.47356  O -1.52382 -7.21274 -1.73000  O -7.17599 -0.03031 2.11504  O -6.12550 -2.70943 2.29276  O -3.79774 -3.17874 0.48143  O -5.73055 -0.51898 -1.24793  O -3.13337 -1.07472 -2.89922  O -4.40888 5.07286 3.02794  O -5.98803 2.63667 2.75545  O -5.21717 1.05258 0.43110  O -4.45355 4.55366 -0.62559  O -6.25444 3.07774 -2.38704  O 1.43945 5.44155 3.35013  O -1.48884 5.46129 3.44287  O -2.65427 4.60512 0.89607  O 0.53745 6.23820 -0.14526  O -1.84886 7.36710 -1.36053  O 6.30815 2.80993 1.71868  O 4.19202 4.65728 2.42738  O 1.77968 4.45919 0.78671  O 4.41542 3.09060 -1.45315  O 2.26076 5.12923 -2.48418  H 5.95920 -3.86748 -0.75969  H 7.36043 -2.07996 0.18326  H 4.79142 -0.84833 1.37800  H 6.52832 0.28055 -0.90934  H 3.69067 -0.99432 -1.00240  H 5.53231 -0.25499 -3.35785  H 4.28121 0.86820 -2.70684  H 0.79175 -7.18148 0.34375  H 3.03459 -6.93796 1.38672  H 2.32036 -3.95160 1.70028  H 4.47872 -5.26133 -0.08337  H 1.83308 -3.88304 -0.94201  H -4.97360 -4.90981 0.61717  H -3.45815 -6.11848 2.09359  H -1.48699 -3.75112 1.85598  H -1.23375 -6.63384 0.75860  H -1.66279 -3.97026 -0.77134  H -0.36716 -5.48198 -2.12388  H -2.05674 -5.42561 -2.74877  H -7.07821 0.81291 -0.50555  H -7.54726 -1.37685 0.53882  H -4.74882 -1.17564 1.84043  H -5.74520 -3.13432 -0.34026  H -3.76109 -0.75516 -0.52962  H -4.98654 -2.11005 -2.96264  H -3.65082 -2.97289 -2.11345  H -4.02061 6.16143 0.54581  H -5.93375 4.97276 1.57927  H -3.99974 2.60583 2.03957  H -6.42959 2.75521 0.14070  H -3.41478 2.70707 -0.58900  H -4.69579 1.64243 -2.32094  H -4.19536 3.28317 -2.87462  H 2.22275 6.49960 0.96586  H 0.35197 7.00886 2.44682  H -0.54874 4.06672 2.16813  H -1.95792 6.59245 1.09360  H -0.46264 4.40427 -0.50481  H -2.25438 5.33620 -1.81736  H -0.67311 5.95191 -2.42695  H 6.28888 2.41466 -1.00273  H 5.86128 4.39274 0.40924  H 3.59934 2.75390 1.73075  H 3.51156 5.22283 -0.13693  H 2.65019 2.28604 -0.61493  H 1.09320 3.46153 -1.88365  H 2.42802 3.14631 -3.03152  H 6.79044 -2.41240 2.51225  H 6.42661 0.85361 1.84282  H 3.44110 -0.51662 -4.43013  H 2.25618 -6.08502 3.51953  H 4.69912 -4.02870 2.33945  H 4.77596 -5.27848 -3.37699  H -3.50583 -4.62761 3.88653  H -0.19185 -5.50793 3.02210  H -1.00984 -7.63347 -2.45215  H -7.28955 -0.67922 2.84821  H -5.36961 -3.20461 2.70612  H -3.11146 -1.24007 -3.86799  H -4.93475 4.65184 3.74606  H -6.19359 1.67322 2.62581  H -6.52649 2.66551 -3.23502  H 0.92486 5.45638 4.18835  H -2.41545 5.11889 3.33505  H -2.48743 7.58193 -2.07412  H 6.19270 3.30153 2.56463  H 3.31203 4.76617 2.87050  H 1.75645 5.65130 -1.81422  H 2.31968 -4.88612 -3.16345  B -0.62909 -0.30330 -0.81127  C 0.34735 -0.06822 0.41275  C 0.39628 1.18366 1.08736  C 1.22832 1.38293 2.20890  C 2.03849 0.32599 2.67958  C 2.01081 -0.92487 2.02496  C 1.17521 -1.11515 0.90506  O -1.49862 0.72133 -1.16377  O -0.60549 -1.51965 -1.47348  H -0.23457 2.01357 0.72703  H 1.25299 2.36535 2.70931  H 2.69351 0.47767 3.55529  H 2.64418 -1.75182 2.38695  H 1.14840 -2.09858 0.40882  H -2.11811 0.44910 -1.88334  H -1.31747 -1.56550 -2.16229 |
| **PhBcat@β-CD** | C 2.77726 -5.73358 -0.71415  C 3.79592 -5.57756 0.44441  C 4.19017 -4.09939 0.64315  C 4.63995 -3.45375 -0.69583  C 3.60317 -3.73502 -1.82514  C 4.05072 -3.26526 -3.21375  C -2.60725 -5.74809 -0.48170  C -1.81140 -6.45810 0.64327  C -0.40570 -5.84293 0.80222  C 0.30746 -5.79723 -0.57220  C -0.56276 -5.07567 -1.63644  C 0.05015 -5.03578 -3.06610  C -6.12807 -1.69822 -0.23683  C -6.20096 -2.83481 0.82266  C -4.81921 -3.48706 1.02975  C -4.22804 -3.90102 -0.33836  C -4.19065 -2.69502 -1.31415  C -3.64139 -3.02357 -2.73163  C -5.18157 3.52984 0.83007  C -5.86339 2.71369 1.95845  C -5.57875 1.20611 1.80656  C -5.90593 0.71255 0.37202  C -5.25791 1.63957 -0.70109  C -5.67096 1.32144 -2.14278  C -0.36154 5.93907 0.85731  C -1.19484 5.91461 2.16368  C -2.12224 4.68425 2.19000  C -2.98362 4.66153 0.90566  C -2.07510 4.69493 -0.35658  C -2.83366 4.69599 -1.71461  C 4.53225 3.83218 0.05634  C 4.25098 4.56587 1.39449  C 2.74724 4.55086 1.72650  C 1.91973 5.04219 0.51482  C 2.28479 4.25107 -0.76896  C 1.51640 4.69595 -2.04834  C 5.91649 -1.30764 -0.78415  C 6.46060 -0.59052 0.48470  C 5.49734 0.52550 0.93765  C 5.21608 1.47603 -0.25057  C 4.66657 0.66719 -1.45674  C 4.34175 1.50891 -2.72491  O 3.23843 -6.14101 1.64746  O 5.21184 -4.07682 1.64046  O 4.73170 -2.03313 -0.44474  O 3.34020 -5.17059 -1.91388  O 2.89623 -3.26018 -4.07934  O -2.57095 -6.39858 1.86606  O 0.28830 -6.64298 1.76403  O 1.55977 -5.09596 -0.36453  O -1.85971 -5.77397 -1.71074  H 0.61314 -4.08287 -3.17774  O 0.87181 -6.15840 -3.40274  O -6.73516 -2.31110 2.05711  O -5.01028 -4.59659 1.91396  O -2.90078 -4.41738 -0.08199  O -5.56441 -2.18743 -1.45162  O -3.98348 -4.31155 -3.24583  O -5.42037 3.20992 3.23677  O -6.34694 0.53448 2.80675  O -5.35487 -0.61876 0.29011  O -5.62467 3.03287 -0.44388  O -4.73304 1.97127 -3.02690  O -0.30615 5.94597 3.29845  O -2.88796 4.76818 3.39989  O -3.76973 3.44323 0.95536  O -1.23808 5.90725 -0.28419  O -4.10604 5.35266 -1.69754  O 5.03010 3.95306 2.44309  O 2.57209 5.35804 2.89468  O 0.52778 4.83155 0.85077  O 3.73231 4.40117 -0.99784  O 1.19131 6.08468 -2.12210  O 6.68668 -1.55854 1.53127  O 6.10204 1.17796 2.06283  O 4.25518 2.44891 0.21784  O 5.66055 -0.35456 -1.81413  O 5.18107 2.64356 -2.94699  H 2.61400 -6.81228 -0.94322  H 4.71639 -6.14424 0.14946  H 3.27761 -3.54057 0.97922  H 5.63982 -3.86668 -0.98051  H 2.65879 -3.20575 -1.55944  H 4.84455 -3.96100 -3.58998  H 4.49590 -2.24560 -3.12343  H -3.54557 -6.31319 -0.69650  H -1.68010 -7.52443 0.32663  H -0.52156 -4.78628 1.15963  H 0.50531 -6.83505 -0.92879  H -0.74486 -4.02518 -1.30732  H -7.15720 -1.35172 -0.49599  H -6.89032 -3.61837 0.41659  H -4.12996 -2.72538 1.48011  H -4.86441 -4.69410 -0.79822  H -3.55231 -1.88581 -0.88549  H -2.53639 -2.86090 -2.70950  H -4.06028 -2.25617 -3.42464  H -5.51671 4.59231 0.86573  H -6.96728 2.86950 1.85159  H -4.47846 1.04570 1.95688  H -7.01649 0.68791 0.23940  H -4.15246 1.52408 -0.61981  H -6.71596 1.69122 -2.30596  H -5.66282 0.21450 -2.28791  H 0.19877 6.89955 0.77405  H -1.83780 6.83209 2.16285  H -1.49384 3.76018 2.18020  H -3.66107 5.54741 0.87594  H -1.39861 3.80796 -0.34307  H -2.93380 3.64231 -2.06136  H -2.17349 5.21791 -2.44927  H 5.59103 3.99221 -0.25569  H 4.56639 5.63215 1.26024  H 2.44767 3.49255 1.92238  H 2.11284 6.12511 0.33094  H 2.07115 3.16833 -0.60443  H 0.60728 4.05296 -2.13618  H 2.16669 4.44694 -2.92069  H 6.69147 -1.99791 -1.19691  H 7.43320 -0.11361 0.19978  H 4.52335 0.05711 1.22788  H 6.15693 1.98724 -0.56677  H 3.72670 0.15628 -1.14632  H 3.26342 1.79650 -2.67288  H 4.44470 0.82211 -3.59874  H 3.82537 -5.84680 2.38093  H 5.56652 -3.15211 1.71255  H 3.18006 -2.96337 -4.96908  H -1.95709 -6.68497 2.57974  H 1.22228 -6.31813 1.83306  H 1.80261 -5.85756 -3.28500  H -6.59419 -3.02018 2.72623  H -4.14145 -5.05962 2.02969  H -3.28453 -4.93923 -2.94175  H -5.73357 2.55777 3.90428  H -6.30299 -0.44319 2.63786  H -5.02351 1.81565 -3.94989  H -0.86345 5.73420 4.08120  H -3.61189 4.09016 3.37218  H -4.77876 4.63732 -1.61988  H 4.61529 4.24368 3.28811  H 1.60975 5.36182 3.13339  H 0.29732 6.19257 -1.71954  H 6.87186 -1.03475 2.34417  H 5.62995 2.03591 2.23107  H 4.72850 3.41642 -2.53312  H -0.80726 -4.99231 -3.78085  C 1.81253 1.12017 2.90319  C 0.54396 1.70973 3.11382  C 0.07267 0.21935 -0.28113  C 0.91153 -0.59704 -1.09194  C -1.16351 0.66488 -0.83088  C -1.54387 0.31934 -2.14389  C -0.68898 -0.48365 -2.93181  C 0.53956 -0.94393 -2.40681  B 0.51963 0.66941 1.13557  O -0.27555 1.41805 2.02769  O 1.79969 0.44866 1.68325  C 2.86862 1.28691 3.80803  C 2.59618 2.07701 4.95323  C 0.26382 2.48884 4.24351  C 1.32515 2.66238 5.16623  H 1.86995 -0.96091 -0.68532  H -1.82756 1.30149 -0.21994  H -2.49752 0.68893 -2.55776  H -0.97819 -0.74768 -3.96382  H 1.21184 -1.56158 -3.02738  H 3.86641 0.86055 3.62268  H 3.39789 2.24193 5.69353  H -0.72534 2.94902 4.39563  H 1.15607 3.27252 6.06961 | C 2.81767 -5.77320 -0.92807  C 3.89031 -5.64698 0.18808  C 4.22743 -4.16434 0.46092  C 4.55703 -3.40530 -0.85408  C 3.47296 -3.67026 -1.93968  C 3.81598 -3.09610 -3.31879  C -2.53730 -5.83548 -0.25243  C -1.68575 -6.44838 0.88823  C -0.26579 -5.84907 0.89310  C 0.37121 -5.96953 -0.51573  C -0.55809 -5.41021 -1.63346  C -0.05675 -5.65776 -3.06403  C -6.00092 -1.74268 -0.20231  C -6.06970 -2.85211 0.88895  C -4.68112 -3.48448 1.12378  C -4.08678 -3.93234 -0.23409  C -4.04671 -2.75322 -1.24067  C -3.47717 -3.11622 -2.63669  C -5.13700 3.51364 0.76965  C -5.79261 2.70570 1.91915  C -5.47611 1.20169 1.78963  C -5.81556 0.68066 0.36650  C -5.20377 1.59609 -0.73612  C -5.65283 1.24436 -2.15883  C -0.39970 6.07843 0.66293  C -1.25432 6.10576 1.96334  C -2.13339 4.84131 2.06137  C -2.96636 4.68876 0.76626  C -2.02985 4.66778 -0.47241  C -2.74993 4.53403 -1.84162  C 4.53230 3.87018 0.39427  C 4.13749 4.51047 1.74864  C 2.60700 4.58764 1.88782  C 1.96394 5.26351 0.64872  C 2.49160 4.66741 -0.69100  C 2.05213 5.44263 -1.94104  C 5.74127 -1.21230 -0.84419  C 6.31023 -0.54829 0.44576  C 5.34266 0.52522 0.98965  C 5.02465 1.52619 -0.14714  C 4.42541 0.77446 -1.36359  C 4.03403 1.67833 -2.56068  O 3.41166 -6.31431 1.37603  O 5.31660 -4.14146 1.39224  O 4.59396 -1.99496 -0.51265  O 3.28338 -5.10912 -2.10537  O 2.63854 -3.15212 -4.15050  O -2.38443 -6.23419 2.13132  O 0.50049 -6.54611 1.88540  O 1.59606 -5.20388 -0.46186  O -1.89128 -6.02552 -1.52484  H 0.85526 -5.03834 -3.23197  O 0.20641 -7.05934 -3.25932  O -6.62538 -2.28635 2.09514  O -4.85357 -4.58377 2.03163  O -2.75720 -4.45369 0.01188  O -5.42232 -2.26497 -1.40384  O -3.88186 -4.39175 -3.16077  O -5.34355 3.25182 3.17631  O -6.21757 0.51470 2.80579  O -5.23633 -0.64425 0.29368  O -5.57854 2.99393 -0.49602  O -4.79908 1.93980 -3.08962  O -0.38430 6.24933 3.10762  O -2.94589 4.97233 3.23934  O -3.71984 3.45523 0.88628  O -1.25701 5.91819 -0.47367  O -4.03111 5.18262 -1.92685  O 4.74298 3.74909 2.81746  O 2.32743 5.29597 3.10262  O 0.54218 5.00895 0.74517  O 3.96035 4.62205 -0.69318  O 2.44473 6.82135 -1.83141  O 6.59561 -1.57283 1.42076  O 5.97353 1.14815 2.12005  O 4.10128 2.51467 0.36794  O 5.41983 -0.20702 -1.81454  O 4.95252 2.74018 -2.86408  H 2.67343 -6.83927 -1.21878  H 4.81560 -6.15384 -0.18491  H 3.31674 -3.67957 0.89869  H 5.55612 -3.73784 -1.22687  H 2.51738 -3.21606 -1.59150  H 4.65729 -3.69064 -3.75904  H 4.17397 -2.04772 -3.19082  H -3.50487 -6.38177 -0.33456  H -1.59905 -7.54430 0.67983  H -0.34664 -4.75873 1.13963  H 0.59038 -7.04160 -0.72761  H -0.65075 -4.30677 -1.48947  H -7.03019 -1.41554 -0.47788  H -6.74964 -3.65200 0.50131  H -4.00055 -2.70955 1.56097  H -4.73136 -4.73178 -0.67035  H -3.41701 -1.92674 -0.83346  H -2.36601 -3.02599 -2.58445  H -3.82346 -2.33365 -3.35038  H -5.49117 4.56940 0.79583  H -6.89936 2.83780 1.81926  H -4.37221 1.06587 1.93290  H -6.92529 0.62996 0.25016  H -4.09630 1.49689 -0.67715  H -6.72643 1.53855 -2.28443  H -5.58066 0.13966 -2.29431  H 0.12034 7.05294 0.51388  H -1.93048 6.99522 1.89546  H -1.46963 3.94519 2.13610  H -3.66905 5.54895 0.66308  H -1.31598 3.81544 -0.38375  H -2.83945 3.45371 -2.09363  H -2.07637 4.98973 -2.60535  H 5.63450 3.93891 0.24630  H 4.54665 5.55265 1.74930  H 2.21103 3.54414 1.93631  H 2.17137 6.35847 0.67502  H 2.09232 3.62866 -0.78190  H 0.94474 5.33378 -2.03645  H 2.51669 4.94794 -2.83325  H 6.52424 -1.84713 -1.32152  H 7.26229 -0.03598 0.15489  H 4.38558 0.03090 1.29072  H 5.96567 2.02566 -0.47772  H 3.50141 0.23679 -1.04773  H 3.00487 2.06773 -2.36944  H 3.96120 1.02452 -3.46079  H 4.02573 -6.07070 2.10671  H 5.60222 -3.19613 1.51386  H 2.82397 -2.63331 -4.96339  H -1.78812 -6.52097 2.85954  H 1.44899 -6.26176 1.79914  H 0.73744 -7.14365 -4.08006  H -6.50751 -2.95967 2.80477  H -3.96238 -4.98485 2.20257  H -3.28026 -5.07238 -2.77131  H -5.64381 2.63753 3.88463  H -6.15638 -0.46259 2.62946  H -5.02739 1.62887 -3.99260  H -0.94575 6.12150 3.90699  H -3.59688 4.22194 3.25706  H -4.70322 4.48897 -1.72107  H 4.19169 3.88824 3.62226  H 1.34224 5.41035 3.17513  H 2.00133 7.30894 -2.55873  H 6.80233 -1.11330 2.26704  H 5.41815 1.92220 2.40600  H 4.72040 3.50324 -2.27988  H -0.84552 -5.28528 -3.76900  C 1.70980 0.96733 2.90342  C 0.51292 1.70599 3.05600  C -0.04322 0.16451 -0.30385  C 0.74166 -0.71728 -1.10038  C -1.25330 0.67160 -0.85928  C -1.66073 0.32164 -2.16302  C -0.85792 -0.54555 -2.93787  C 0.34289 -1.06811 -2.40668  B 0.42594 0.61338 1.10539  O -0.30082 1.48035 1.94896  O 1.65631 0.26516 1.70047  C 2.74345 1.02850 3.84569  C 2.52701 1.87093 4.96686  C 0.28623 2.53699 4.16062  C 1.32731 2.60650 5.12078  H 1.68059 -1.12893 -0.69260  H -1.87450 1.35846 -0.25845  H -2.59503 0.73277 -2.58262  H -1.16708 -0.81281 -3.96295  H 0.97394 -1.73664 -3.01767  H 3.68667 0.47613 3.71358  H 3.31632 1.95472 5.73385  H -0.64573 3.11362 4.27291  H 1.19811 3.25400 6.00444 |
| **PhBpin@β-CD** | C -6.34574 -1.21099 -0.57528  C -6.48692 -2.46107 0.33117  C -5.18806 -3.29265 0.32234  C -4.69290 -3.57130 -1.12281  C -4.67894 -2.27271 -1.98478  C -4.34209 -2.49499 -3.47714  C -4.51066 3.74689 0.45671  C -5.29461 3.04763 1.59635  C -5.20265 1.51339 1.46790  C -5.61176 1.07815 0.03797  C -4.78757 1.83206 -1.03950  C -5.17055 1.51862 -2.51063  C 0.41558 5.80171 0.09094  C -0.51617 6.18224 1.28110  C -1.50555 5.04146 1.60701  C -2.22787 4.60843 0.30829  C -1.18635 4.19765 -0.76353  C -1.76608 3.68269 -2.10029  C 5.30594 3.51580 0.39004  C 4.91257 4.45231 1.56147  C 3.38131 4.58635 1.67343  C 2.73648 4.92692 0.30255  C 3.24040 3.96051 -0.81172  C 2.75729 4.29378 -2.24177  C 6.10135 -1.79892 0.28628  C 6.48236 -1.08678 1.60885  C 5.68721 0.22470 1.76444  C 5.80944 1.09263 0.48736  C 5.45315 0.28602 -0.79133  C 5.61618 1.04839 -2.13719  C 2.35844 -5.49881 -0.82333  C 3.18889 -5.64748 0.47838  C 3.68087 -4.27650 0.98633  C 4.39111 -3.51848 -0.16457  C 3.45970 -3.39948 -1.40006  C 4.05894 -2.65958 -2.63044  C -2.92247 -5.23557 -1.69194  C -2.36288 -6.28829 -0.69241  C -1.03554 -5.81226 -0.06466  C -0.06386 -5.35697 -1.18052  C -0.72922 -4.27801 -2.07277  C 0.15896 -3.71196 -3.21140  O -6.83696 -2.03135 1.66050  O -5.44379 -4.49350 1.05372  O -3.35308 -4.08950 -0.95965  O -5.98688 -1.62251 -1.90756  O -3.95886 -1.28970 -4.16095  O -4.79364 3.52853 2.85729  O -6.05162 0.94858 2.47287  O -5.36807 -0.34855 -0.01496  O -4.95728 3.27956 -0.82772  H -4.56150 0.65838 -2.86234  O -6.56764 1.26918 -2.72170  O 0.28880 6.54168 2.42088  O -2.40641 5.53334 2.60636  O -3.11949 3.51996 0.64158  O -0.35790 5.37652 -1.03267  O -2.83611 4.44336 -2.66375  O 5.49440 3.94610 2.77863  O 3.11826 5.57978 2.66705  O 1.31339 4.78142 0.51294  O 4.70545 3.98323 -0.82768  O 2.95330 3.20837 -3.16614  O 6.25529 -1.99273 2.70522  O 6.18425 0.89160 2.92887  O 4.89137 2.19172 0.69281  O 6.31066 -0.91305 -0.82870  O 6.66237 2.03024 -2.14875  O 2.39428 -6.34216 1.45780  O 4.54631 -4.52343 2.09914  O 4.74729 -2.22090 0.36532  O 3.10273 -4.76650 -1.81531  O 5.44763 -2.87839 -2.87037  O -3.36117 -6.57168 0.30901  O -0.52356 -6.90078 0.71195  O 1.12722 -4.85879 -0.52532  O -1.93086 -4.88664 -2.65819  O 0.96045 -4.66307 -3.91213  H -7.32627 -0.69127 -0.67747  H -7.30634 -3.09076 -0.10236  H -4.39161 -2.67649 0.81766  H -5.35613 -4.33913 -1.59438  H -3.91026 -1.59430 -1.54403  H -5.25143 -2.88445 -3.99064  H -3.54260 -3.26842 -3.55614  H -4.73582 4.83929 0.45847  H -6.37125 3.33220 1.47359  H -4.13329 1.21096 1.62305  H -6.69447 1.28927 -0.12482  H -3.70949 1.57601 -0.90112  H 0.97558 6.70370 -0.25539  H -1.12136 7.06498 0.94947  H -0.92459 4.16065 1.98597  H -2.81162 5.46990 -0.09648  H -0.53890 3.38040 -0.36062  H -2.04678 2.61164 -1.94627  H -0.93005 3.68570 -2.83538  H 6.40555 3.55610 0.21614  H 5.33080 5.46476 1.32603  H 2.97010 3.58810 1.97800  H 2.98386 5.98405 0.03244  H 2.88782 2.93603 -0.54992  H 3.34713 5.16531 -2.61334  H 1.68884 4.60604 -2.19765  H 6.77807 -2.66695 0.10565  H 7.56948 -0.82586 1.54032  H 4.60453 -0.04471 1.88619  H 6.85321 1.47305 0.39160  H 4.39322 -0.04942 -0.71402  H 4.64207 1.51627 -2.40364  H 5.83440 0.27853 -2.91674  H 2.18210 -6.50296 -1.27594  H 4.09509 -6.25341 0.21852  H 2.78893 -3.66867 1.29341  H 5.31001 -4.07340 -0.47018  H 2.52824 -2.86151 -1.10040  H 3.81886 -1.57286 -2.52312  H 3.49418 -3.01855 -3.52343  H -3.77078 -5.67269 -2.27092  H -2.14302 -7.21472 -1.28282  H -1.24610 -4.92040 0.58160  H 0.19595 -6.22525 -1.83125  H -1.03643 -3.41160 -1.44102  H 0.77212 -2.88542 -2.77093  H -0.52380 -3.22893 -3.94889  H -6.77207 -2.83093 2.22987  H -4.66080 -5.09298 0.94969  H -3.02949 -1.06382 -3.91542  H -5.19372 2.95821 3.55107  H -6.11824 -0.02510 2.30876  H -6.63937 0.30173 -2.88288  H -0.33640 6.62334 3.17679  H -3.04679 4.81170 2.82653  H -3.66438 4.19123 -2.18770  H 5.09658 4.47365 3.50786  H 2.14132 5.74978 2.69092  H 2.12688 2.66992 -3.21339  H 6.33925 -1.45622 3.52536  H 5.78686 1.79819 2.95989  H 6.20439 2.89969 -2.11692  H 2.88579 -6.27537 2.30705  H 4.92936 -3.65892 2.39334  H 5.93915 -2.19958 -2.34721  H -2.90707 -7.11779 0.99080  H 0.34383 -6.62502 1.10272  H 1.79035 -4.78639 -3.39150  H -4.86190 2.40123 -3.12113  C -0.05055 0.13186 -1.64496  C -1.05467 -0.58093 -0.93546  C -0.86557 -0.97309 0.40441  C 0.34070 -0.65640 1.06631  C 1.35140 0.05657 0.38482  C 1.15410 0.44443 -0.95531  B -0.22938 0.52665 -3.14740  O 0.59299 1.44481 -3.78439  C 0.35801 1.34777 -5.25220  C 1.51223 0.48519 -5.81813  C 0.41695 2.77047 -5.84291  O -1.17920 -0.02762 -3.98988  C -1.08386 0.63897 -5.32561  C -2.27031 1.62651 -5.43293  C -1.21257 -0.45827 -6.40204  H -1.99971 -0.83561 -1.44145  H -1.65981 -1.53124 0.92897  H 0.49416 -0.96469 2.11483  H 2.29332 0.31556 0.89668  H 1.95050 0.99825 -1.48025  H 1.51060 -0.54129 -5.39479  H 1.45168 0.40291 -6.92430  H 2.48361 0.95945 -5.56171  H 1.42662 3.20382 -5.67322  H 0.23236 2.74388 -6.93919  H -0.32700 3.45140 -5.38297  H -2.24503 2.42213 -4.66040  H -2.28359 2.11899 -6.42898  H -3.22456 1.06907 -5.32296  H -2.22239 -0.91712 -6.34302  H -1.09139 -0.02498 -7.41919  H -0.46353 -1.26566 -6.27449 | C -5.97990 -1.00604 -0.66063  C -6.16389 -2.16123 0.35808  C -4.89067 -3.02787 0.44586  C -4.44893 -3.49326 -0.96915  C -4.36004 -2.29048 -1.95114  C -4.06583 -2.68910 -3.41018  C -4.49365 4.09927 0.09427  C -5.47218 3.42377 1.09894  C -5.25543 1.89456 1.15213  C -5.25692 1.31445 -0.28507  C -4.20311 2.03925 -1.16253  C -4.10879 1.54631 -2.62792  C 0.32224 6.22824 1.17224  C -0.64501 6.16553 2.38693  C -1.71030 5.07137 2.17943  C -2.39889 5.22945 0.80175  C -1.37650 5.40614 -0.36019  C -2.01402 5.77038 -1.70912  C 4.94792 3.45969 0.62220  C 4.58195 4.01162 2.02532  C 3.05711 4.20119 2.16287  C 2.50399 5.04620 0.98274  C 2.96062 4.45981 -0.38594  C 2.58454 5.32052 -1.59815  C 5.81667 -1.60726 -0.94586  C 6.43562 -1.08492 0.38252  C 5.57862 0.05140 0.98308  C 5.32814 1.13743 -0.09344  C 4.70836 0.52329 -1.37486  C 4.47796 1.52731 -2.53501  C 2.41554 -5.77210 -1.42583  C 3.38766 -5.81338 -0.21468  C 3.83674 -4.38971 0.17530  C 4.39568 -3.64388 -1.06176  C 3.42551 -3.72368 -2.27804  C 4.01709 -3.16576 -3.58185  C -2.97228 -5.48564 -1.11659  C -2.23191 -6.17025 0.06488  C -0.78594 -5.64476 0.18950  C -0.05629 -5.78785 -1.16944  C -0.87943 -5.16908 -2.33774  C -0.28767 -5.44335 -3.72879  O -6.52676 -1.59728 1.63439  O -5.18138 -4.12717 1.31801  O -3.13558 -4.09452 -0.83654  O -5.62188 -1.54669 -1.94692  O -3.70019 -1.56596 -4.22868  O -5.30628 4.04615 2.39081  O -6.30171 1.34040 1.96418  O -4.99068 -0.10555 -0.18262  O -4.57343 3.46060 -1.18407  H -3.38651 0.69966 -2.67265  O -5.36271 1.19535 -3.23454  O 0.12924 5.95863 3.58810  O -2.65663 5.16384 3.25793  O -3.17064 4.02121 0.61849  O -0.41972 6.46318 -0.02672  O -2.84141 6.93967 -1.56613  O 5.11486 3.12033 3.02489  O 2.81420 4.82098 3.43253  O 1.06177 5.00747 1.09670  O 4.41979 4.32817 -0.39442  O 2.85546 4.56236 -2.79195  O 6.59115 -2.19141 1.29581  O 6.28581 0.56771 2.12211  O 4.44966 2.13488 0.48657  O 5.62370 -0.52181 -1.85668  O 5.47738 2.55616 -2.65472  O 2.74084 -6.49591 0.88175  O 4.81485 -4.51603 1.21803  O 4.58118 -2.26602 -0.65985  O 3.04479 -5.11288 -2.52753  O 5.26490 -3.81753 -3.87905  O -2.99035 -5.97535 1.27650  O -0.14835 -6.39793 1.23072  O 1.21243 -5.10323 -1.03986  O -2.24377 -5.69595 -2.33092  O -0.10103 -6.85598 -3.91818  H -6.95041 -0.48269 -0.82377  H -6.99613 -2.80504 -0.02551  H -4.06762 -2.39275 0.86231  H -5.18011 -4.24520 -1.35443  H -3.54745 -1.61811 -1.58997  H -4.98623 -3.13403 -3.85392  H -3.28033 -3.48155 -3.41345  H -4.78743 5.15942 -0.08314  H -6.51002 3.60443 0.72021  H -4.24885 1.69189 1.60212  H -6.25828 1.47539 -0.75135  H -3.19108 1.93540 -0.70222  H 1.01228 7.09775 1.27540  H -1.16529 7.15493 2.43905  H -1.19880 4.07623 2.18760  H -3.06971 6.11925 0.83420  H -0.83152 4.44074 -0.49493  H -2.60509 4.89109 -2.05956  H -1.18907 5.93702 -2.44863  H 6.05277 3.48407 0.48131  H 5.06451 5.01832 2.11291  H 2.57362 3.19167 2.10824  H 2.86989 6.09704 1.08332  H 2.50040 3.45008 -0.50618  H 3.17894 6.26873 -1.56474  H 1.50776 5.59914 -1.51815  H 6.52176 -2.30289 -1.45747  H 7.44016 -0.65994 0.13110  H 4.58666 -0.37086 1.28760  H 6.29874 1.60812 -0.37407  H 3.72492 0.05454 -1.13309  H 3.46027 1.96437 -2.43913  H 4.47845 0.92995 -3.47631  H 2.19276 -6.80317 -1.78512  H 4.29141 -6.39005 -0.53595  H 2.93944 -3.82195 0.53466  H 5.37236 -4.09958 -1.34637  H 2.51132 -3.12539 -2.03873  H 4.14884 -2.06425 -3.45458  H 3.26690 -3.32525 -4.39914  H -3.96351 -5.96834 -1.27988  H -2.18020 -7.26216 -0.17408  H -0.82351 -4.55430 0.44734  H 0.10770 -6.87066 -1.37782  H -0.90587 -4.06010 -2.19847  H 0.67654 -4.88666 -3.80617  H -0.98571 -5.01334 -4.49276  H -6.41870 -2.31130 2.30423  H -4.35227 -4.66727 1.42183  H -2.80663 -1.25331 -3.93852  H -5.84811 3.52745 3.02896  H -6.19491 0.35350 1.97535  H -5.47631 0.22349 -3.09645  H -0.50356 5.73728 4.30918  H -3.43721 4.59494 3.02604  H -3.34664 7.04337 -2.40118  H 4.72280 3.38359 3.88877  H 1.84178 5.01652 3.50515  H 2.65426 5.13290 -3.56481  H 6.83889 -1.80639 2.16778  H 5.74991 1.30963 2.50693  H 5.10958 3.34847 -2.19490  H 3.31460 -6.37366 1.67302  H 5.24800 -3.63030 1.34781  H 5.69441 -3.30870 -4.60008  H -2.41623 -6.24599 2.02910  H 0.82962 -6.22003 1.19533  H 0.43936 -6.97194 -4.72910  H -3.65746 2.37637 -3.22212  C -0.40695 0.14670 -1.19931  C -1.11716 -0.85560 -0.48535  C -1.40195 -0.70760 0.88784  C -0.98224 0.45158 1.57692  C -0.26201 1.45402 0.89031  C 0.02301 1.29807 -0.48052  B -0.10499 0.06170 -2.73322  O 1.01856 0.63963 -3.28734  C 0.83537 0.68351 -4.75732  C 2.19300 0.44458 -5.44530  C 0.31061 2.10506 -5.08255  O -0.94400 -0.52848 -3.67860  C -0.23599 -0.47904 -4.99973  C -1.26034 -0.18189 -6.11109  C 0.39200 -1.87705 -5.20546  H -1.44407 -1.77402 -1.00032  H -1.95385 -1.49957 1.42267  H -1.21233 0.57206 2.64989  H 0.07743 2.36139 1.41720  H 0.58159 2.08711 -1.01361  H 2.70310 -0.45846 -5.05332  H 2.05537 0.32301 -6.54190  H 2.86213 1.31606 -5.28231  H 1.00808 2.85056 -4.64281  H 0.25223 2.27776 -6.17842  H -0.69590 2.28758 -4.64774  H -1.84178 0.74099 -5.91124  H -0.73729 -0.06065 -7.08460  H -1.97767 -1.02413 -6.21248  H -0.40871 -2.64707 -5.17205  H 0.89525 -1.95322 -6.19255  H 1.13457 -2.11865 -4.41595 |
| **Bxb@β-CD** | C -0.33534 6.40493 -2.38806  C -1.32056 6.75691 -1.24423  C -2.34014 5.62032 -1.02218  C -3.01085 5.18040 -2.35193  C -1.95587 4.96686 -3.48126  C -2.56871 4.72374 -4.86534  C 4.40576 3.84707 -2.09220  C 4.03327 4.82451 -0.94786  C 2.50356 4.96417 -0.81664  C 1.88659 5.32079 -2.19114  C 2.33095 4.31948 -3.29262  C 1.82794 4.66008 -4.72666  C 5.57324 -1.39122 -1.87614  C 6.22501 -0.38914 -0.88144  C 5.30413 0.82295 -0.64007  C 4.91708 1.44279 -2.00289  C 4.28060 0.38629 -2.94547  C 3.95711 0.92512 -4.37115  C 2.52136 -5.64153 -0.41015  C 3.70160 -5.24842 0.52056  C 4.10042 -3.76710 0.33519  C 4.32517 -3.42514 -1.16253  C 3.12686 -3.91654 -2.01757  C 3.32782 -3.79514 -3.53561  C -2.70840 -5.28881 0.83561  C -1.75341 -5.37552 2.05118  C -0.33442 -4.90614 1.67149  C 0.16711 -5.64607 0.40574  C -0.88713 -5.64495 -0.74336  C -0.51640 -6.54414 -1.93339  C -5.95809 -1.29763 -0.70327  C -5.98021 -1.82140 0.75799  C -4.61229 -2.41379 1.15068  C -4.19010 -3.46576 0.09673  C -4.19447 -2.86275 -1.33355  C -3.81549 -3.86884 -2.45590  C -5.02102 3.69219 -2.48243  C -5.93752 3.48048 -1.24447  C -5.59118 2.17001 -0.50735  C -5.55274 0.99482 -1.51214  C -4.60900 1.31115 -2.70002  C -4.52928 0.19193 -3.77594  O -0.56992 7.03515 -0.04603  O -3.28391 6.08824 -0.05709  O -3.67990 3.93522 -2.04584  O -1.08743 6.13819 -3.58568  O -1.52783 4.25396 -5.74216  O 4.64147 4.37171 0.27739  O 2.26156 5.96571 0.17706  O 0.44850 5.28466 -2.00893  O 3.80213 4.28089 -3.32388  H 0.87888 4.11165 -4.91630  O 1.65716 6.05992 -4.98663  O 6.55516 -1.06360 0.35140  O 6.02513 1.72906 0.20274  O 3.99502 2.53054 -1.74532  O 5.22204 -0.73432 -3.08903  O 4.88843 1.88064 -4.88542  O 3.33789 -5.52042 1.89036  O 5.26333 -3.55386 1.13574  O 4.43188 -1.98885 -1.25193  O 2.87202 -5.33636 -1.76472  O 2.13441 -4.17556 -4.25676  O -2.30752 -4.59793 3.13016  O 0.50299 -5.13660 2.80753  O 1.34987 -4.92924 -0.02238  O -2.19447 -6.08347 -0.24965  O -0.14493 -7.84793 -1.46368  O -6.37888 -0.75463 1.63930  O -4.75624 -2.96941 2.46360  O -2.86338 -3.92961 0.45363  O -5.54619 -2.34518 -1.60131  O -4.30609 -5.20099 -2.28734  O -5.83911 4.62334 -0.36822  O -6.57557 2.00207 0.51821  O -5.09445 -0.17346 -0.78593  O -5.07653 2.55263 -3.33451  O -5.75044 -0.50838 -4.02663  H 0.30852 7.28202 -2.62954  H -1.88405 7.67008 -1.56615  H -1.77515 4.72890 -0.64186  H -3.75138 5.95891 -2.66037  H -1.34036 4.07905 -3.20588  H -3.02083 5.68161 -5.23278  H -3.38402 3.96649 -4.76531  H 5.50511 3.88150 -2.27739  H 4.44401 5.82781 -1.22964  H 2.08475 3.97187 -0.50359  H 2.20808 6.34429 -2.49394  H 1.96089 3.30197 -3.02067  H 6.31188 -2.17759 -2.16274  H 7.16356 -0.01503 -1.36363  H 4.36560 0.46586 -0.14238  H 5.83323 1.83447 -2.50532  H 3.33345 0.00193 -2.49473  H 2.91412 1.32322 -4.36316  H 3.94931 0.04789 -5.05862  H 2.34062 -6.74123 -0.38891  H 4.57777 -5.88272 0.22883  H 3.24414 -3.13144 0.68275  H 5.27050 -3.91296 -1.50957  H 2.23128 -3.31962 -1.72779  H 4.19964 -4.42004 -3.85493  H 3.54493 -2.74116 -3.80656  H -3.69339 -5.74562 1.08827  H -1.69289 -6.45470 2.34372  H -0.38588 -3.81351 1.42425  H 0.41844 -6.69722 0.67664  H -0.97164 -4.60044 -1.12713  H 0.32251 -6.04390 -2.48140  H -1.39948 -6.57629 -2.62236  H -6.99085 -1.02797 -1.02554  H -6.73350 -2.65020 0.79507  H -3.85334 -1.58897 1.14068  H -4.90800 -4.31997 0.11276  H -3.47197 -2.01369 -1.38024  H -2.70357 -3.84103 -2.56936  H -4.23940 -3.47202 -3.40787  H -5.39595 4.55022 -3.09084  H -6.98629 3.38871 -1.62599  H -4.56379 2.27199 -0.06835  H -6.57575 0.81285 -1.91822  H -3.57664 1.47536 -2.31663  H -3.70322 -0.50012 -3.48214  H -4.21079 0.67952 -4.72700  H -1.22995 7.10302 0.68059  H -4.05982 5.46947 -0.04219  H -1.91976 4.07348 -6.62196  H 4.22476 4.89458 0.99924  H 1.28959 6.15620 0.20622  H 0.68848 6.22602 -4.93647  H 6.77834 -0.34819 0.99088  H 5.46446 2.53135 0.35954  H 4.58973 2.77164 -4.58618  H 4.05200 -5.11791 2.43675  H 5.59711 -2.63199 0.97171  H 1.89683 -5.08589 -3.97552  H -1.60583 -4.53443 3.81641  H 1.45042 -5.05925 2.52311  H 0.02665 -8.41400 -2.24443  H -6.19431 -1.07486 2.55156  H -3.88217 -3.33892 2.74832  H -3.67548 -5.67830 -1.69748  H -6.31679 4.36495 0.45370  H -6.38969 1.15628 1.00146  H -5.78230 -1.27193 -3.40320  H 2.58461 4.25047 -5.43804  C -0.96622 0.85458 -1.99350  C -1.09839 -0.07900 -0.94161  C -0.44168 0.41133 -3.22403  C -0.02395 -0.93437 -3.41597  C -0.16729 -1.85564 -2.35275  C -0.70812 -1.42812 -1.12000  H -1.27139 1.90500 -1.84685  H -1.51810 0.24584 0.02602  H 0.14272 -2.90606 -2.48278  H -0.83548 -2.14334 -0.29074  C -0.21325 1.20362 -4.50367  O 0.35253 0.28639 -5.46230  B 0.52141 -0.98424 -4.90272  O 1.09667 -1.96571 -5.64988  H 0.49625 2.05030 -4.34490  H -1.14644 1.65539 -4.91564  H 1.27959 -2.81157 -5.16913 | C -0.39643 6.27464 -2.44602  C -1.31883 6.66307 -1.25891  C -2.33111 5.53649 -0.95726  C -3.07962 5.09087 -2.24306  C -2.09081 4.83068 -3.42001  C -2.79193 4.59989 -4.76383  C 4.39196 3.79726 -2.09262  C 3.93747 4.62471 -0.85649  C 2.39927 4.73694 -0.79221  C 1.85001 5.25616 -2.14420  C 2.39527 4.41879 -3.33703  C 1.98930 4.94666 -4.72150  C 5.67431 -1.44071 -1.93767  C 6.34436 -0.39298 -1.00693  C 5.42376 0.82691 -0.79228  C 4.97588 1.39937 -2.16518  C 4.35720 0.28572 -3.05968  C 4.00536 0.73866 -4.48403  C 2.62069 -5.60971 -0.30832  C 3.81723 -5.20777 0.59956  C 4.22760 -3.73681 0.36146  C 4.42147 -3.44089 -1.15142  C 3.20179 -3.94199 -1.97317  C 3.37527 -3.83283 -3.49598  C -2.61680 -5.22202 0.88437  C -1.67383 -5.27917 2.11291  C -0.24887 -4.81526 1.74174  C 0.25986 -5.56231 0.48129  C -0.77175 -5.54326 -0.68411  C -0.39006 -6.41340 -1.89044  C -6.00880 -1.41505 -0.78446  C -6.06872 -1.95587 0.67556  C -4.68177 -2.45773 1.12923  C -4.14362 -3.47063 0.09013  C -4.12687 -2.85705 -1.33499  C -3.64159 -3.82445 -2.44606  C -5.17946 3.74760 -2.17803  C -5.95560 3.46549 -0.86245  C -5.58317 2.08545 -0.28152  C -5.75200 0.98884 -1.36318  C -5.01084 1.36596 -2.67988  C -5.26841 0.39377 -3.84012  O -0.49698 6.96707 -0.11118  O -3.22510 6.02685 0.05004  O -3.78257 3.87000 -1.89695  O -1.19969 5.97452 -3.58922  O -1.83002 4.10586 -5.71552  O 4.48552 4.02936 0.33760  O 2.07659 5.61332 0.29746  O 0.40874 5.15576 -2.07022  O 3.85394 4.37726 -3.28455  H 0.89043 4.79786 -4.84917  O 2.35118 6.33526 -4.84534  O 6.70374 -1.02722 0.23859  O 6.16547 1.77707 -0.01211  O 3.98617 2.43452 -1.93902  O 5.30396 -0.82672 -3.17613  O 5.14699 1.34051 -5.11363  O 3.44727 -5.44646 1.97498  O 5.42139 -3.49392 1.11751  O 4.54131 -2.00214 -1.27599  O 2.94827 -5.34887 -1.67697  O 2.11907 -3.99447 -4.19735  O -2.26573 -4.47708 3.15388  O 0.60480 -5.04904 2.87134  O 1.46671 -4.86910 0.08518  O -2.08174 -6.00041 -0.20377  O -0.10298 -7.75580 -1.46443  O -6.58820 -0.92681 1.54316  O -4.83454 -3.04920 2.43158  O -2.80908 -3.86428 0.50287  O -5.48976 -2.42488 -1.65797  O -4.11132 -5.17944 -2.33866  O -5.70159 4.53459 0.07464  O -6.42640 1.86515 0.85715  O -5.20364 -0.23573 -0.81586  O -5.42754 2.70114 -3.11820  O -6.68088 0.25683 -4.07544  H 0.24221 7.13656 -2.74695  H -1.89121 7.57361 -1.56865  H -1.75690 4.64757 -0.58756  H -3.80796 5.88612 -2.53217  H -1.48163 3.93005 -3.17141  H -3.24635 5.56730 -5.10098  H -3.62274 3.87071 -4.61166  H 5.49821 3.86366 -2.20592  H 4.35135 5.65606 -0.99069  H 1.97672 3.71218 -0.62116  H 2.15702 6.31954 -2.27656  H 1.99581 3.37861 -3.24331  H 6.40560 -2.23771 -2.20628  H 7.26936 -0.03906 -1.52846  H 4.50684 0.49089 -0.24486  H 5.86005 1.82477 -2.69489  H 3.41414 -0.07965 -2.58391  H 3.14400 1.44617 -4.41201  H 3.64413 -0.15642 -5.05032  H 2.42849 -6.70527 -0.24987  H 4.68051 -5.86240 0.31824  H 3.39056 -3.08161 0.71634  H 5.35442 -3.94189 -1.50710  H 2.31716 -3.33115 -1.67704  H 4.12876 -4.57690 -3.84829  H 3.74923 -2.81947 -3.75047  H -3.58920 -5.70462 1.13221  H -1.61729 -6.35040 2.43042  H -0.29212 -3.72240 1.49523  H 0.48669 -6.61877 0.75393  H -0.86106 -4.49202 -1.04734  H 0.49060 -5.93924 -2.38605  H -1.24120 -6.38083 -2.61939  H -7.03550 -1.19919 -1.15943  H -6.76763 -2.83020 0.67061  H -3.98038 -1.58571 1.16916  H -4.81117 -4.36409 0.07258  H -3.45355 -1.96781 -1.35318  H -2.52659 -3.77824 -2.48203  H -4.00780 -3.42149 -3.41835  H -5.56343 4.67949 -2.65455  H -7.04381 3.44787 -1.12278  H -4.50234 2.10658 0.01649  H -6.83681 0.85822 -1.58292  H -3.91206 1.36571 -2.48395  H -4.80019 -0.58325 -3.57386  H -4.73402 0.78305 -4.74521  H -1.10471 7.08067 0.65545  H -3.96757 5.37384 0.15925  H -2.31841 3.86557 -6.53278  H 4.09859 4.49651 1.11224  H 1.11995 5.87288 0.22018  H 1.90720 6.67987 -5.64989  H 6.93151 -0.30251 0.86674  H 5.54668 2.50773 0.25538  H 4.83593 1.76178 -5.94332  H 4.15935 -5.05713 2.53310  H 5.72622 -2.56754 0.92182  H 1.87691 -4.94571 -4.23186  H -1.67976 -4.52624 3.94186  H 1.54603 -4.95387 2.56776  H 0.29933 -8.22474 -2.22701  H -6.45331 -1.23761 2.46832  H -3.93863 -3.33511 2.74398  H -3.52679 -5.64303 -1.69024  H -6.07097 4.24611 0.94132  H -6.29644 0.92884 1.16778  H -6.81299 -0.57145 -4.58418  H 2.50774 4.31508 -5.48862  C -1.09423 0.95077 -2.12466  C -1.23714 0.01886 -1.07250  C -0.44597 0.53617 -3.30655  C 0.06091 -0.78569 -3.45270  C -0.09453 -1.70746 -2.38978  C -0.74143 -1.30189 -1.20196  H -1.49575 1.97205 -2.01544  H -1.75168 0.32005 -0.14409  H 0.28086 -2.73898 -2.49304  H -0.88298 -2.01384 -0.37178  C -0.17302 1.33695 -4.57109  O 0.47278 0.42544 -5.49959  B 0.66803 -0.82929 -4.90750  O 1.30492 -1.79314 -5.63668  H 0.51133 2.19768 -4.37794  H -1.08751 1.76852 -5.03802  H 1.49404 -2.64200 -5.14593 |
| **FcBA@β-CD** | C 4.15375 4.72185 0.11145  C 3.62114 5.66432 1.21844  C 2.11157 5.44061 1.46059  C 1.29854 5.48218 0.13300  C 1.98226 4.60647 -0.96640  C 1.37609 4.81247 -2.35690  C 6.19383 -0.18486 0.94460  C 6.13263 0.72465 2.19513  C 5.04035 1.80062 2.04064  C 5.22616 2.56130 0.70667  C 5.38323 1.59650 -0.50794  C 5.72463 2.30831 -1.82582  C 3.69309 -4.85665 0.00031  C 4.32723 -4.58620 1.39519  C 4.35350 -3.07727 1.70949  C 5.05709 -2.33576 0.55209  C 4.39597 -2.66420 -0.81168  C 5.12290 -2.01814 -2.02951  C -1.52948 -6.07609 -0.78063  C -0.76539 -6.70753 0.40939  C 0.43139 -5.83035 0.82809  C 1.32670 -5.50995 -0.39942  C 0.48471 -4.94694 -1.58623  C 1.30405 -4.78953 -2.88621  C -5.69376 -2.65421 -0.52951  C -5.65076 -3.81387 0.50612  C -4.20472 -4.30445 0.71987  C -3.54087 -4.63714 -0.63452  C -3.69318 -3.47836 -1.65160  C -3.18339 -3.82185 -3.08883  C -5.39528 2.55703 0.94666  C -5.69776 1.54323 2.07747  C -5.20257 0.12223 1.73433  C -5.71010 -0.30739 0.33647  C -5.42505 0.79210 -0.73368  C -6.02401 0.47859 -2.11315  C -1.13667 5.86617 0.52257  C -1.84533 5.67585 1.89671  C -2.52620 4.29682 1.98731  C -3.48148 4.11903 0.78828  C -2.75673 4.37906 -0.56041  C -3.72025 4.38244 -1.79116  O 4.36436 5.45589 2.43604  O 1.71286 6.44557 2.39468  O -0.03240 4.95986 0.37999  O 3.39355 4.93939 -1.07903  O 1.88598 3.78725 -3.24869  O 5.92040 -0.09471 3.36203  O 5.13330 2.65583 3.18525  O 4.03631 3.36800 0.54144  O 6.43494 0.61101 -0.23057  H 4.81058 2.84995 -2.17096  O 6.83218 3.20505 -1.62537  O 3.63308 -5.32577 2.41869  O 5.03307 -2.93029 2.96176  O 4.98124 -0.91708 0.83205  O 4.39705 -4.11712 -1.00041  O 6.54359 -1.90774 -1.91547  O -1.67472 -6.91730 1.50822  O 1.11519 -6.55265 1.85373  O 2.30379 -4.52464 0.02245  O -0.62382 -5.86140 -1.87460  O 0.64904 -3.97702 -3.87141  O -6.24046 -3.38364 1.75403  O -4.27025 -5.43084 1.60128  O -2.13435 -4.86315 -0.35932  O -5.10728 -3.08625 -1.75220  O -3.21130 -5.21509 -3.42799  O -5.12066 2.02309 3.30943  O -5.65379 -0.72954 2.79112  O -4.98984 -1.51314 -0.01059  O -5.95310 2.08938 -0.29085  O -7.41957 0.16142 -1.98524  O -0.92790 5.86323 2.99191  O -3.20045 4.26149 3.25059  O -3.98992 2.76131 0.83215  O -2.09002 5.68693 -0.52277  O -5.06627 4.78431 -1.52278  H 5.20801 4.96137 -0.15903  H 3.76564 6.71580 0.85932  H 1.98171 4.41204 1.88529  H 1.23747 6.54360 -0.21570  H 1.86994 3.53314 -0.68136  H 1.66110 5.82753 -2.72880  H 0.26387 4.76363 -2.27519  H 7.06756 -0.87421 1.01637  H 7.12080 1.24610 2.26988  H 4.04467 1.28634 2.00023  H 6.13122 3.20722 0.77885  H 4.41361 1.06510 -0.66192  H 3.82803 -5.92911 -0.27687  H 5.38860 -4.93914 1.33645  H 3.29900 -2.70214 1.77495  H 6.12406 -2.65658 0.50191  H 3.33941 -2.30226 -0.81369  H 4.65386 -1.02346 -2.21752  H 4.90339 -2.67007 -2.90946  H -2.29630 -6.78629 -1.16779  H -0.36316 -7.69175 0.05673  H 0.03432 -4.85395 1.20916  H 1.84475 -6.44747 -0.72267  H 0.07557 -3.95302 -1.28904  H 1.46592 -5.81208 -3.30966  H 2.30440 -4.38150 -2.61800  H -6.74505 -2.37752 -0.77733  H -6.25021 -4.65800 0.08087  H -3.62304 -3.46596 1.18495  H -4.00197 -5.55801 -1.06067  H -3.11532 -2.60650 -1.27032  H -2.15461 -3.41847 -3.20870  H -3.84101 -3.26823 -3.80013  H -5.91189 3.52247 1.15888  H -6.81233 1.49428 2.17391  H -4.08251 0.13670 1.68654  H -6.80699 -0.49649 0.38279  H -4.31851 0.87134 -0.85671  H -5.44548 -0.37444 -2.54695  H -5.85673 1.36995 -2.77306  H -0.77998 6.91849 0.42145  H -2.64657 6.45741 1.94485  H -1.73698 3.50399 1.92988  H -4.32470 4.84184 0.88014  H -1.98207 3.58874 -0.71228  H -3.69704 3.37188 -2.26220  H -3.28890 5.09479 -2.53261  H 3.86771 5.95383 3.12715  H 0.81042 6.21293 2.74155  H 1.55417 3.97021 -4.15322  H 5.69580 0.52460 4.09293  H 4.69217 3.51961 2.97959  H 6.99181 3.67202 -2.47153  H 3.92480 -4.93401 3.27431  H 5.13596 -1.96378 3.15848  H 6.73048 -1.01414 -1.54170  H -1.10529 -7.12636 2.28425  H 1.90285 -6.02566 2.15210  H 1.14466 -3.12677 -3.93923  H -6.02942 -4.09792 2.39969  H -3.35790 -5.80927 1.69364  H -2.28660 -5.53540 -3.32245  H -5.20206 1.28268 3.95267  H -5.69229 -1.66649 2.46137  H -7.72713 -0.18321 -2.84907  H -1.37375 5.48249 3.78415  H -3.69313 3.40335 3.32855  H -5.57138 3.96513 -1.30824  H 5.95407 1.52239 -2.58963  Fe -0.53072 0.12132 -1.18414  C 0.26165 0.12855 -3.12161  C -0.72203 -0.93519 -2.97175  H -0.51817 -2.00590 -3.10283  C -1.99050 -0.35052 -2.62324  H -2.93018 -0.88710 -2.44257  C -1.81450 1.07724 -2.54405  H -2.59490 1.80756 -2.30001  C -0.43829 1.37630 -2.84097  H 0.00719 2.37787 -2.87012  C 1.05232 0.17673 0.18983  H 2.11246 0.35107 -0.04658  C 0.39758 -1.11310 0.23333  H 0.87283 -2.08641 0.04337  C -0.98718 -0.89506 0.58724  H -1.75282 -1.67545 0.70347  C -1.18724 0.52629 0.76189  H -2.13015 1.02553 1.02299  C 0.07429 1.18882 0.51634  H 0.24785 2.27356 0.56564  B 1.78394 -0.06828 -3.40461  O 2.73824 0.92814 -3.36017  H 2.39331 1.83304 -3.16095  O 2.21344 -1.35855 -3.74036  H 3.17331 -1.38115 -3.94189 | C 4.12508 4.74953 0.21191  C 3.58118 5.61455 1.37761  C 2.08222 5.33171 1.62331  C 1.26081 5.43334 0.30415  C 1.93398 4.60270 -0.83230  C 1.29547 4.82178 -2.20594  C 6.33500 -0.13682 0.64099  C 6.41533 0.74797 1.91591  C 5.28848 1.79976 1.91477  C 5.29811 2.59279 0.58764  C 5.34316 1.66788 -0.66337  C 5.56926 2.42404 -1.98150  C 3.69843 -4.84388 0.25390  C 4.22598 -4.41891 1.65207  C 4.33728 -2.88424 1.77418  C 5.17202 -2.32982 0.59433  C 4.61517 -2.82554 -0.77223  C 5.47075 -2.41186 -1.97907  C -1.45158 -6.00467 -0.87472  C -0.71909 -6.67626 0.31951  C 0.43443 -5.78125 0.81785  C 1.37576 -5.42575 -0.36341  C 0.58804 -4.84208 -1.57331  C 1.47404 -4.70530 -2.83213  C -5.71677 -2.71716 -0.43833  C -5.59984 -3.86379 0.60508  C -4.13191 -4.31227 0.76383  C -3.52031 -4.65445 -0.61630  C -3.76961 -3.53267 -1.66298  C -3.36784 -3.92355 -3.09411  C -5.48335 2.54916 0.79994  C -5.87710 1.58320 1.94954  C -5.35584 0.15114 1.70128  C -5.75160 -0.33078 0.28357  C -5.38818 0.72123 -0.80708  C -5.89984 0.36172 -2.21004  C -1.17480 5.82634 0.63030  C -1.95240 5.64756 1.96762  C -2.65819 4.27852 2.02717  C -3.54755 4.10113 0.77395  C -2.74880 4.35160 -0.53639  C -3.63251 4.36769 -1.80602  O 4.36714 5.35936 2.56141  O 1.64871 6.26762 2.61712  O -0.07256 4.91400 0.56007  O 3.33543 4.98719 -0.95671  O 1.82654 3.84247 -3.13475  O 6.36416 -0.10142 3.08263  O 5.48401 2.65474 3.05283  O 4.08023 3.37521 0.58631  O 6.41906 0.68483 -0.52371  H 4.66847 3.05105 -2.17743  O 6.76276 3.22719 -1.89291  O 3.37884 -4.98395 2.67267  O 4.93337 -2.60865 3.04963  O 5.11483 -0.88577 0.66475  O 4.52754 -4.28551 -0.77108  O 6.82826 -2.84999 -1.80209  O -1.67050 -6.95999 1.36790  O 1.10951 -6.50135 1.85917  O 2.33483 -4.44308 0.10506  O -0.51789 -5.73302 -1.92283  O 0.91980 -3.85356 -3.84991  O -6.16188 -3.42029 1.86010  O -4.11791 -5.43351 1.65862  O -2.09283 -4.81317 -0.42023  O -5.18350 -3.15276 -1.68945  O -4.05705 -5.12400 -3.48984  O -5.40082 2.12874 3.19741  O -5.90067 -0.68031 2.73634  O -5.02147 -1.55931 0.04025  O -5.94149 2.03238 -0.45290  O -7.32057 0.14234 -2.17906  O -1.06291 5.83562 3.08553  O -3.41734 4.24735 3.24408  O -4.06774 2.74810 0.79591  O -2.07166 5.64828 -0.46981  O -4.77586 5.23707 -1.71667  H 5.16146 5.05345 -0.06114  H 3.68821 6.68711 1.07505  H 1.98330 4.27810 1.99062  H 1.20045 6.50472 -0.00589  H 1.86752 3.51913 -0.57188  H 1.52636 5.85622 -2.55797  H 0.18799 4.72866 -2.10985  H 7.21158 -0.82308 0.58680  H 7.39755 1.28319 1.88513  H 4.30737 1.26173 1.98188  H 6.18821 3.26370 0.57527  H 4.36591 1.13559 -0.75083  H 3.79204 -5.94802 0.13584  H 5.25922 -4.84102 1.74434  H 3.30968 -2.44022 1.70828  H 6.22599 -2.67791 0.69970  H 3.59707 -2.39022 -0.92654  H 5.40758 -1.30098 -2.07438  H 5.01253 -2.86098 -2.89885  H -2.19772 -6.70392 -1.31877  H -0.28101 -7.63428 -0.05844  H 0.00097 -4.82632 1.20820  H 1.90751 -6.35375 -0.68636  H 0.18099 -3.84269 -1.29051  H 1.60490 -5.72889 -3.26049  H 2.48142 -4.35414 -2.51655  H -6.78577 -2.47469 -0.63759  H -6.19290 -4.72766 0.21306  H -3.55191 -3.45449 1.19278  H -3.96946 -5.60604 -0.98450  H -3.15474 -2.65040 -1.36802  H -2.25968 -4.06016 -3.11864  H -3.61518 -3.06617 -3.77205  H -6.00851 3.52344 0.93231  H -6.99524 1.53858 1.95911  H -4.23630 0.16273 1.75242  H -6.84964 -0.51725 0.25627  H -4.27584 0.79208 -0.86096  H -5.35328 -0.55127 -2.55017  H -5.62464 1.19426 -2.90771  H -0.80924 6.87530 0.54395  H -2.74256 6.44096 1.97995  H -1.87984 3.47314 2.02207  H -4.38874 4.83195 0.82210  H -1.98787 3.54243 -0.65967  H -3.94827 3.32366 -2.02971  H -2.99810 4.71320 -2.65607  H 3.87972 5.77367 3.31154  H 0.72731 6.01870 2.89973  H 1.48634 4.05585 -4.03182  H 6.25313 0.48786 3.86395  H 4.92011 3.46493 2.93490  H 6.76162 3.83460 -2.66369  H 3.62711 -4.56520 3.52828  H 5.22710 -1.65816 3.06595  H 7.37727 -2.37809 -2.46474  H -1.14234 -7.17085 2.17312  H 1.79558 -5.90104 2.25648  H 1.37248 -2.97570 -3.78015  H -5.92393 -4.10052 2.53225  H -3.19779 -5.81218 1.66663  H -3.60195 -5.47057 -4.28701  H -5.55125 1.44637 3.89086  H -5.78770 -1.63273 2.47008  H -7.56977 -0.27793 -3.03009  H -1.52608 5.50285 3.88879  H -3.92976 3.39578 3.27194  H -5.55319 4.68017 -1.49476  H 5.63587 1.67077 -2.80675  Fe -0.59997 0.13712 -1.16781  C 0.26145 0.15449 -3.06853  C -0.70692 -0.93130 -2.95092  H -0.48553 -2.00043 -3.07125  C -2.00026 -0.36841 -2.65622  H -2.93526 -0.92440 -2.51162  C -1.85763 1.06413 -2.58116  H -2.66221 1.78012 -2.37620  C -0.47774 1.38923 -2.82883  H -0.05414 2.40090 -2.84881  C 0.95189 0.23797 0.23733  H 2.00956 0.44664 0.01666  C 0.33591 -1.07192 0.26163  H 0.84664 -2.02694 0.07042  C -1.06313 -0.89881 0.58873  H -1.80710 -1.70293 0.68456  C -1.30948 0.51591 0.76684  H -2.27051 0.98801 1.01183  C -0.06330 1.21799 0.54950  H 0.07893 2.30697 0.60890  B 1.80766 0.01246 -3.25762  O 2.70202 1.05945 -3.23839  H 2.31272 1.96270 -3.10308  O 2.31695 -1.27342 -3.48135  H 3.28400 -1.26980 -3.65609 |
